# Supplementary material for: Stable Dual miR-143 and miR-506 Upregulation Inhibits Proliferation and Cell Cycle Progression
Source: MDPI journal article supplement (doi:10.3390/ijms25084432), 2024-04-17

# **Stable Dual miR-143 and miR-506 Upregulation Inhibits Proliferation and Cell Cycle Progression**

Archana Shrestha<sup>1</sup>, Behnaz Lahooti<sup>2</sup>, AKM Nawshad Hossian<sup>1</sup>, Mahboubeh Madadi<sup>3</sup>,  
Constantinos M. Mikelis<sup>2, 4</sup>, George Mattheolabakis<sup>1, \*</sup>

Supplementary Figure S1: Vector maps for lentiviruses used to induce miRNA deregulation to the A549 cells. Vector maps were provided by the vendor (ABMgood).

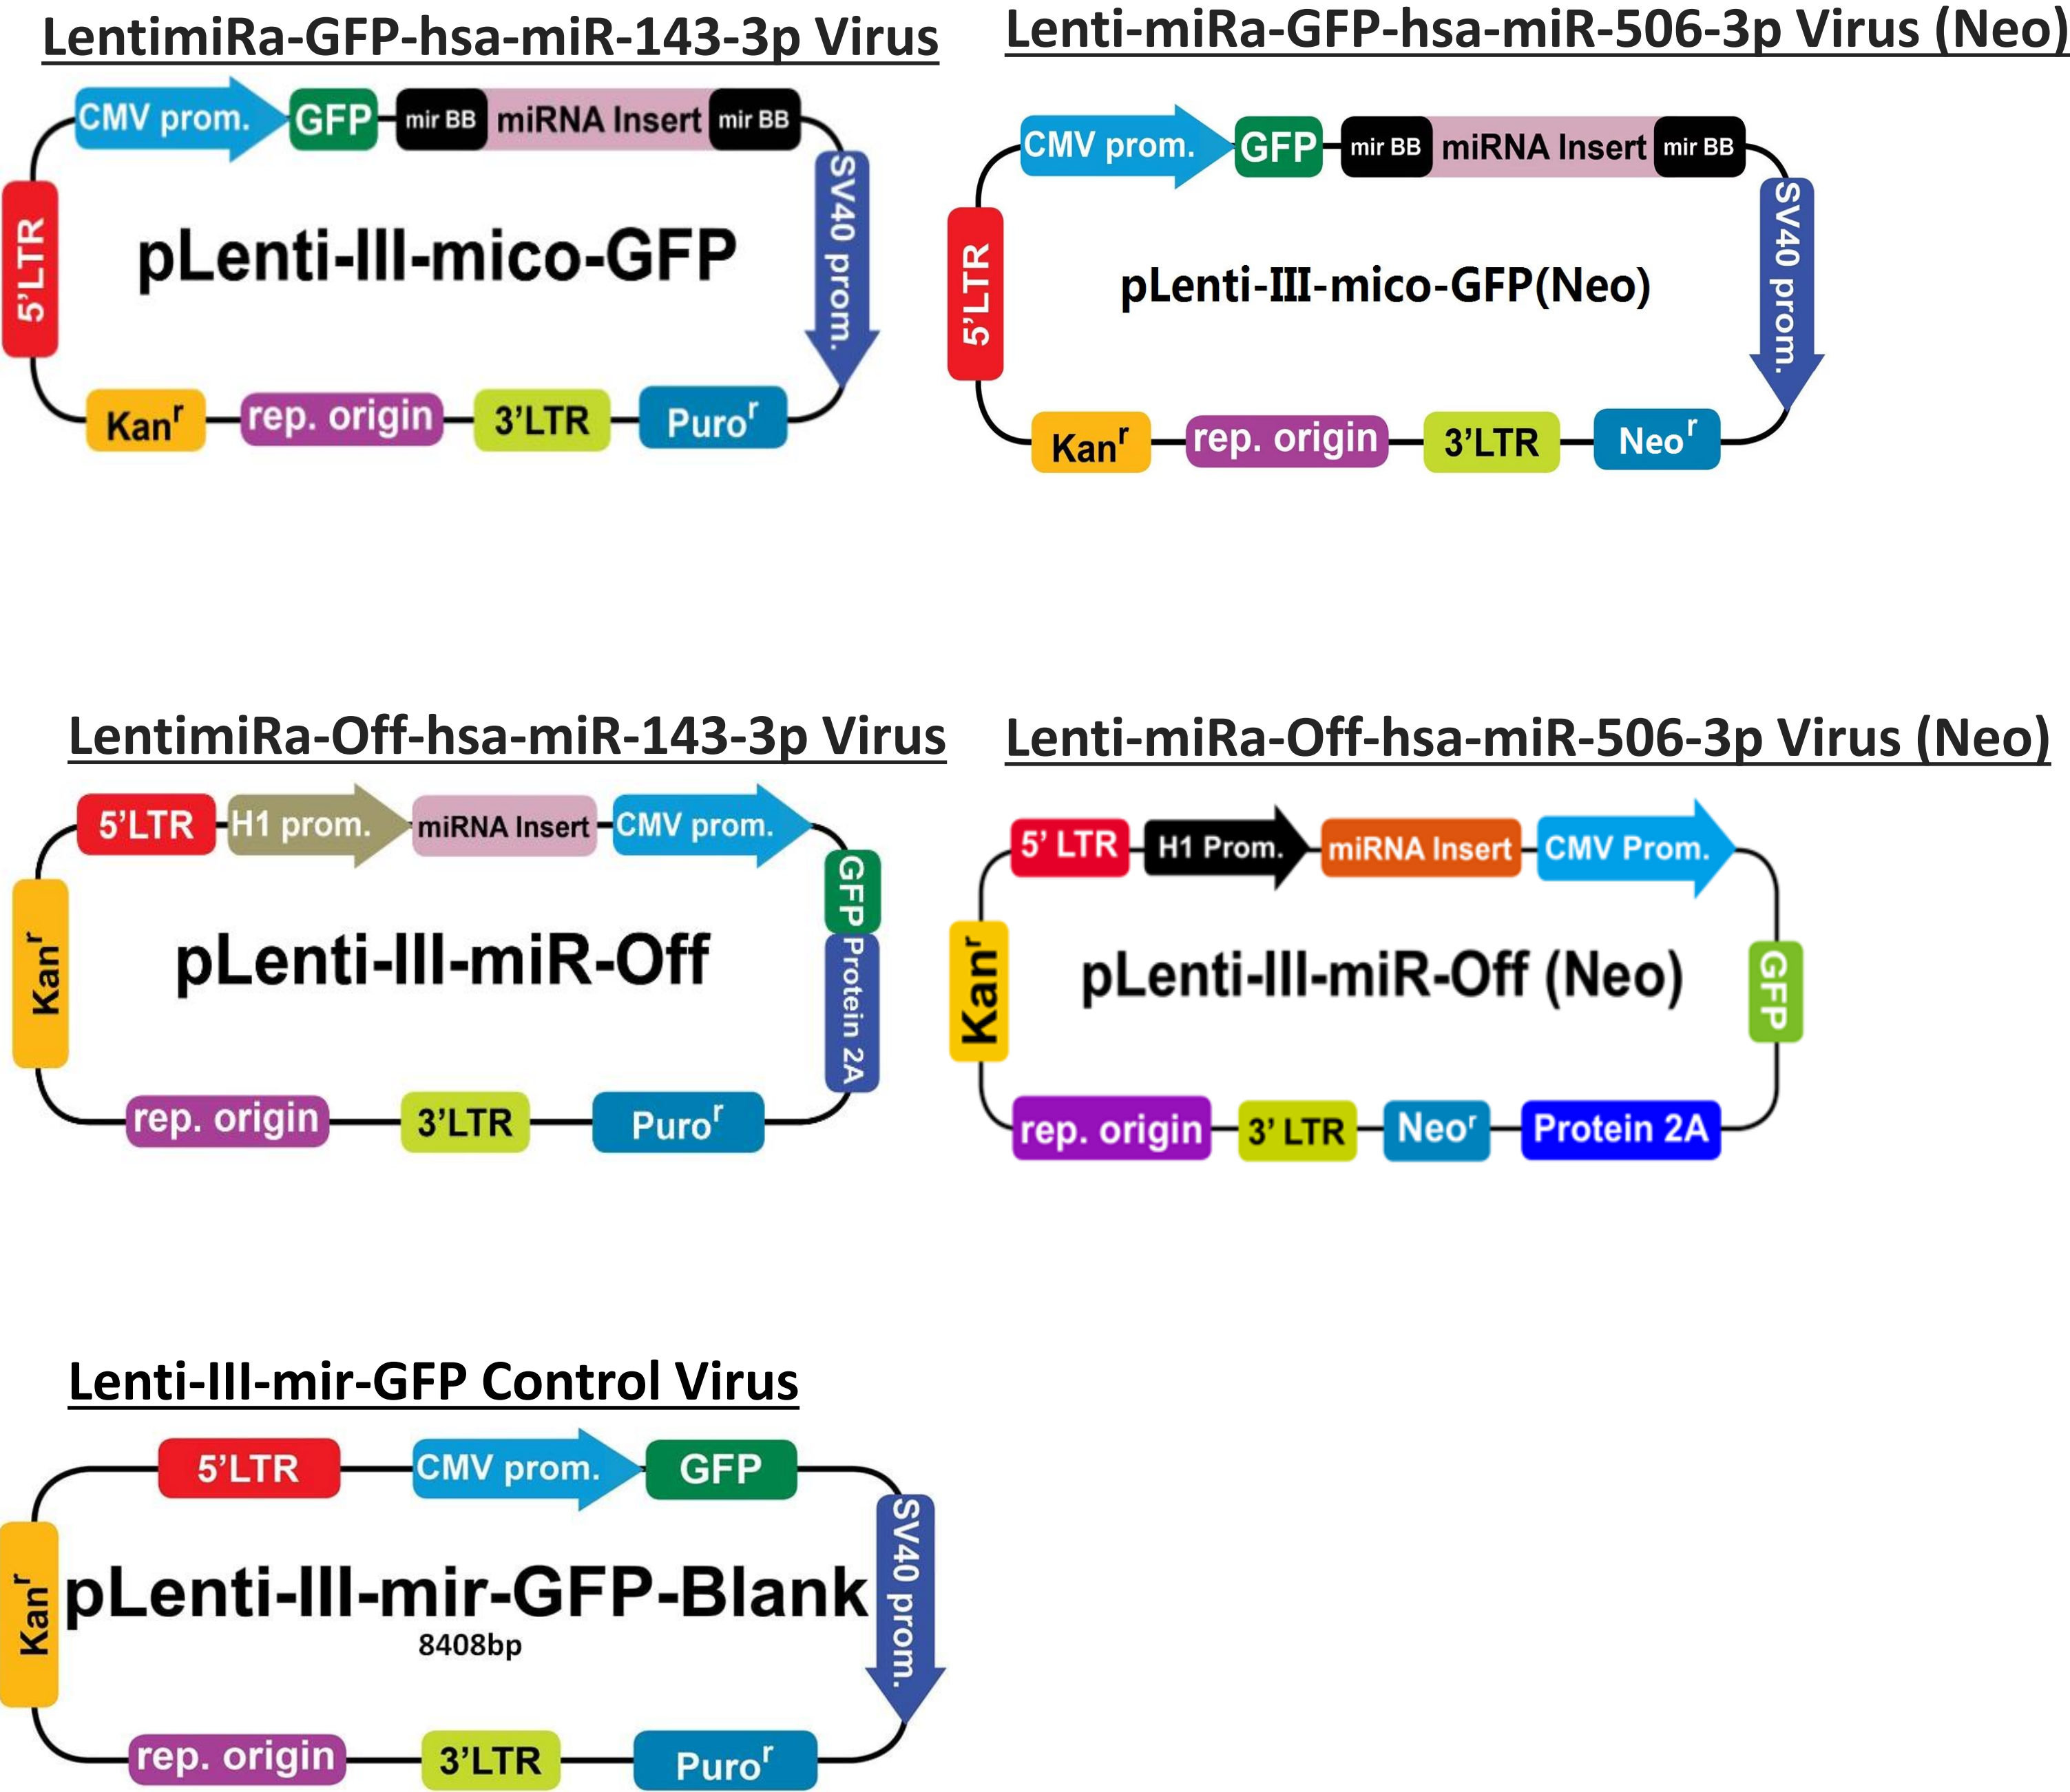



Supplementary Figure S2: Cell sorting of A549 cells transduced using lentiviral particles for miR deregulation. GFP signal was used for selecting cells.

Sorting analysis of A549-miR-control cells

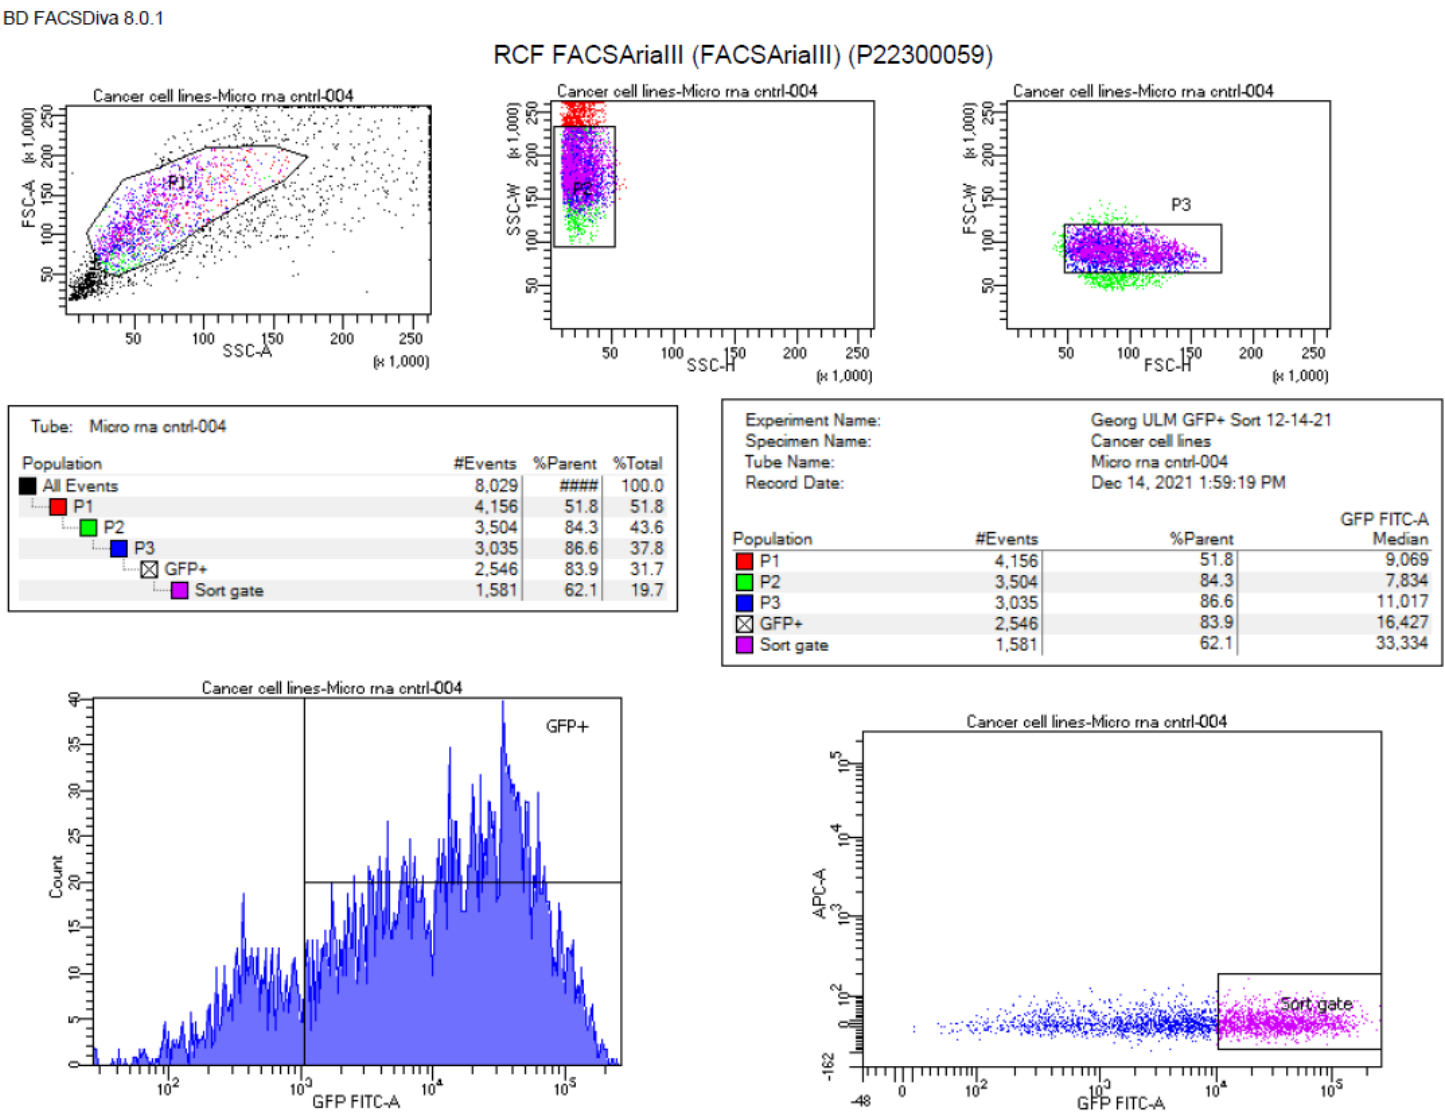

Sorting analysis of A549-miR-143 cells

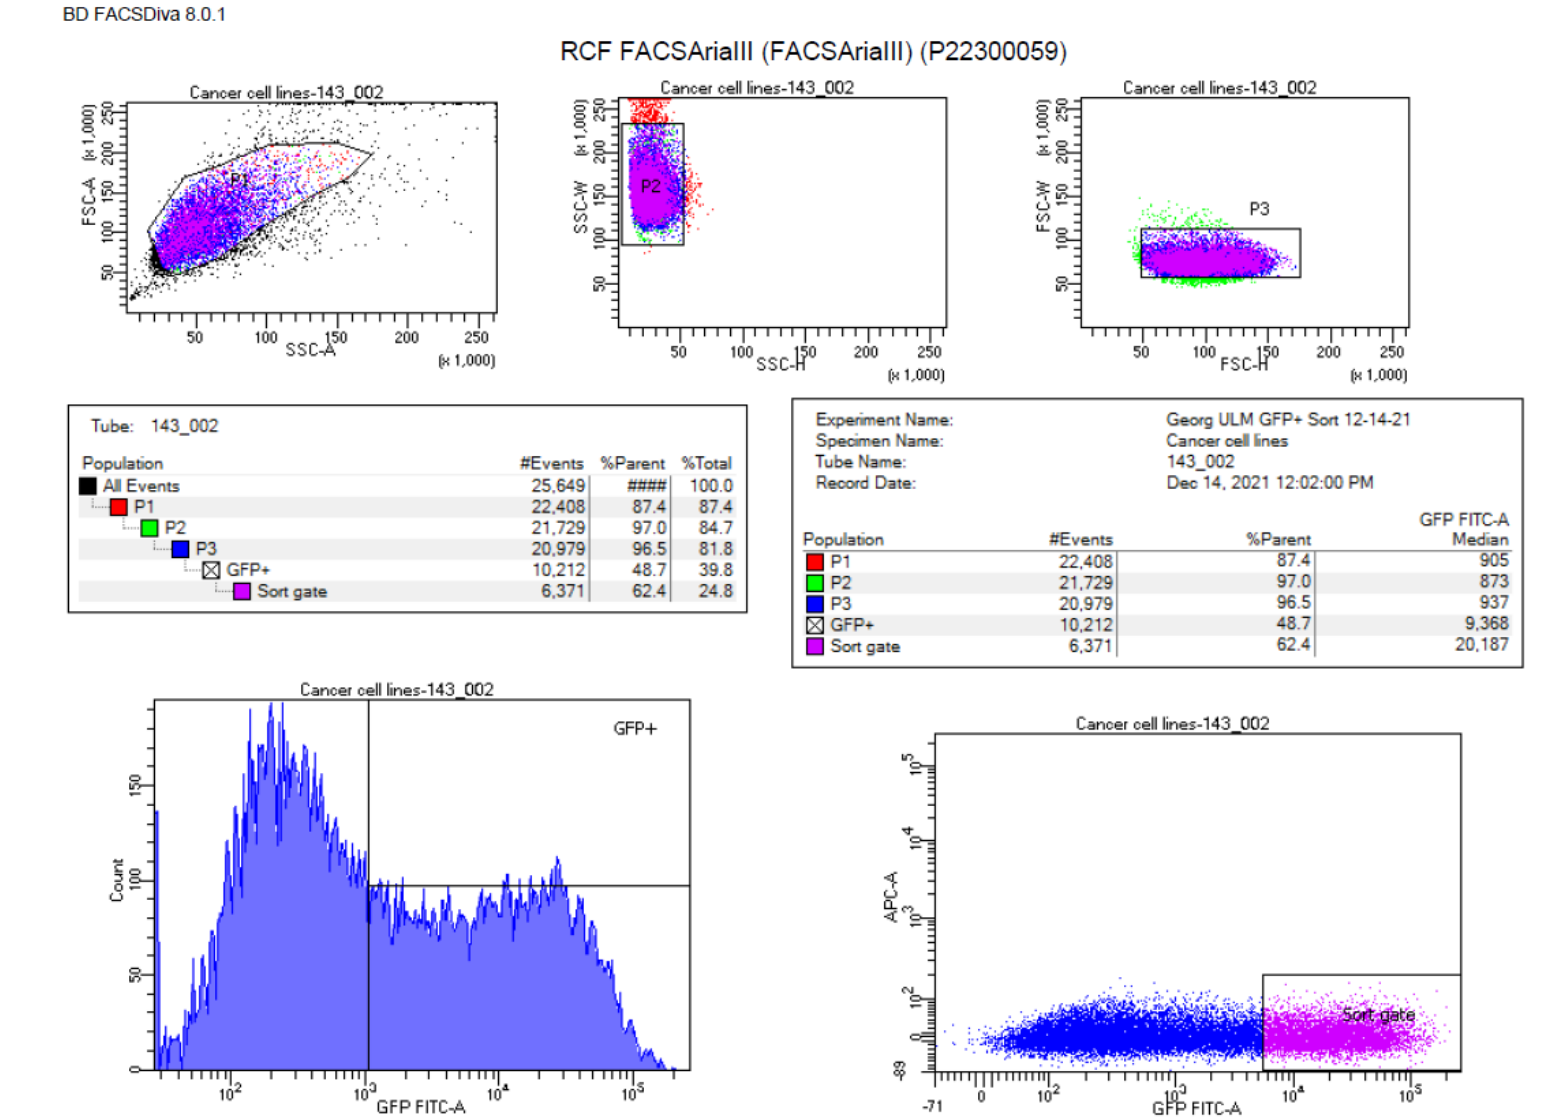

Sorting analysis of A549-anti-miR-143 cells

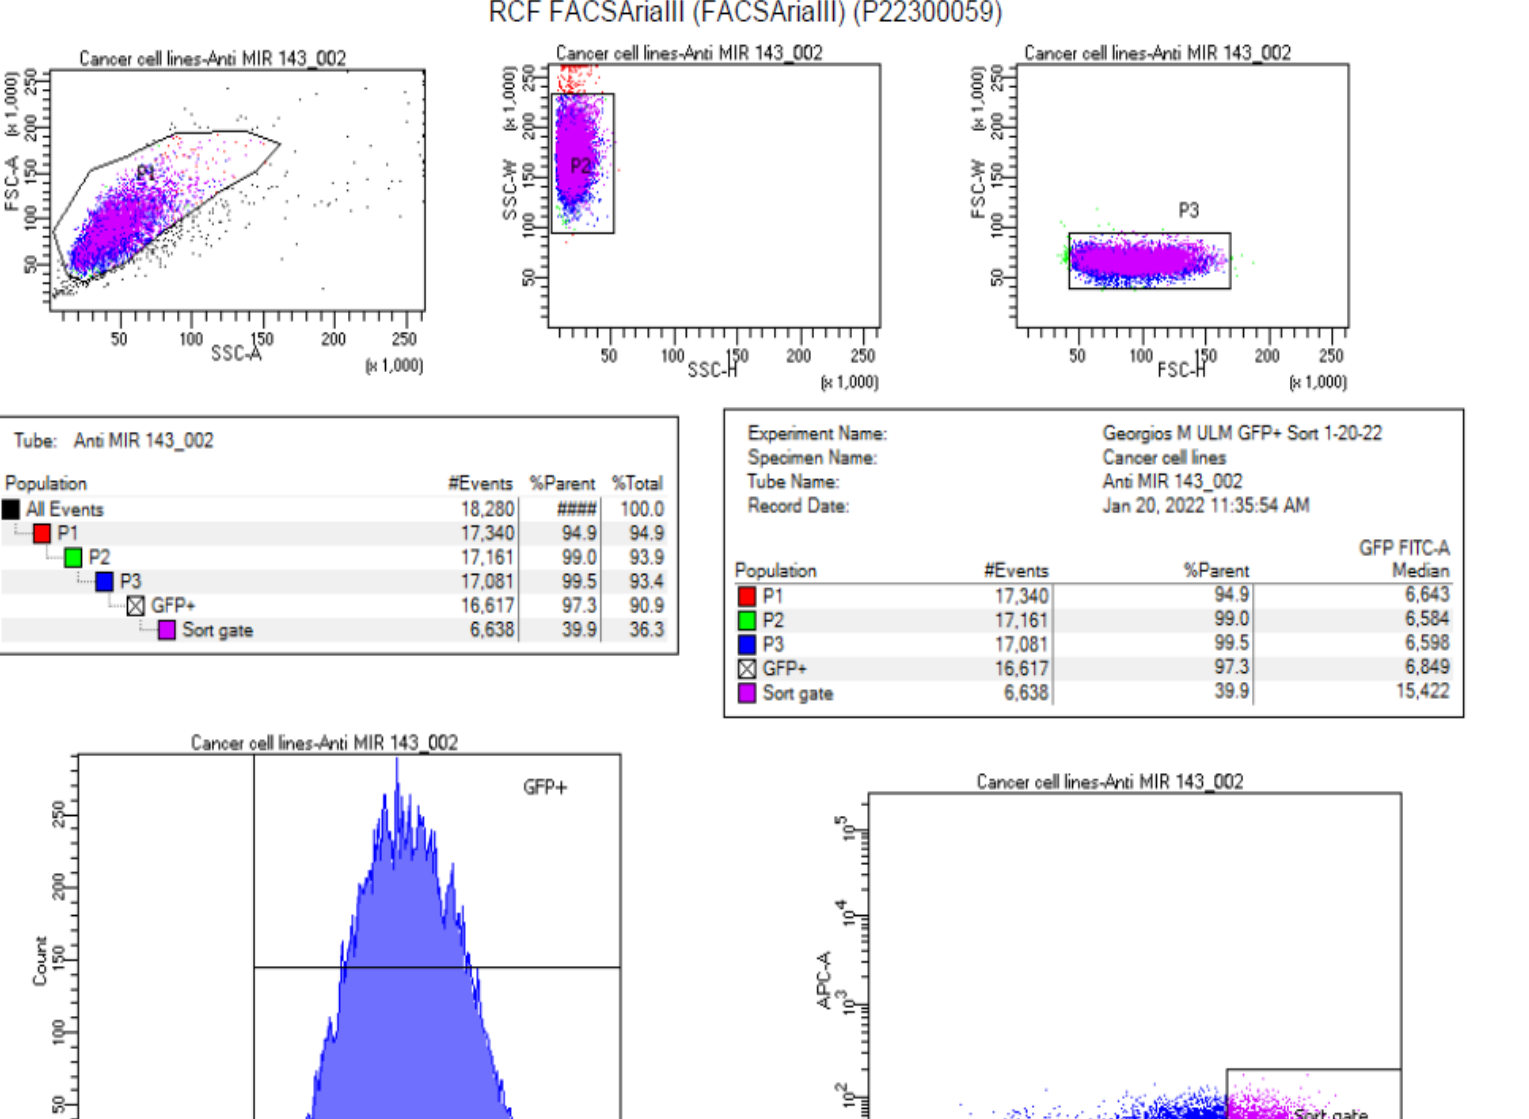

Sorting analysis of A549-miR-506 cells

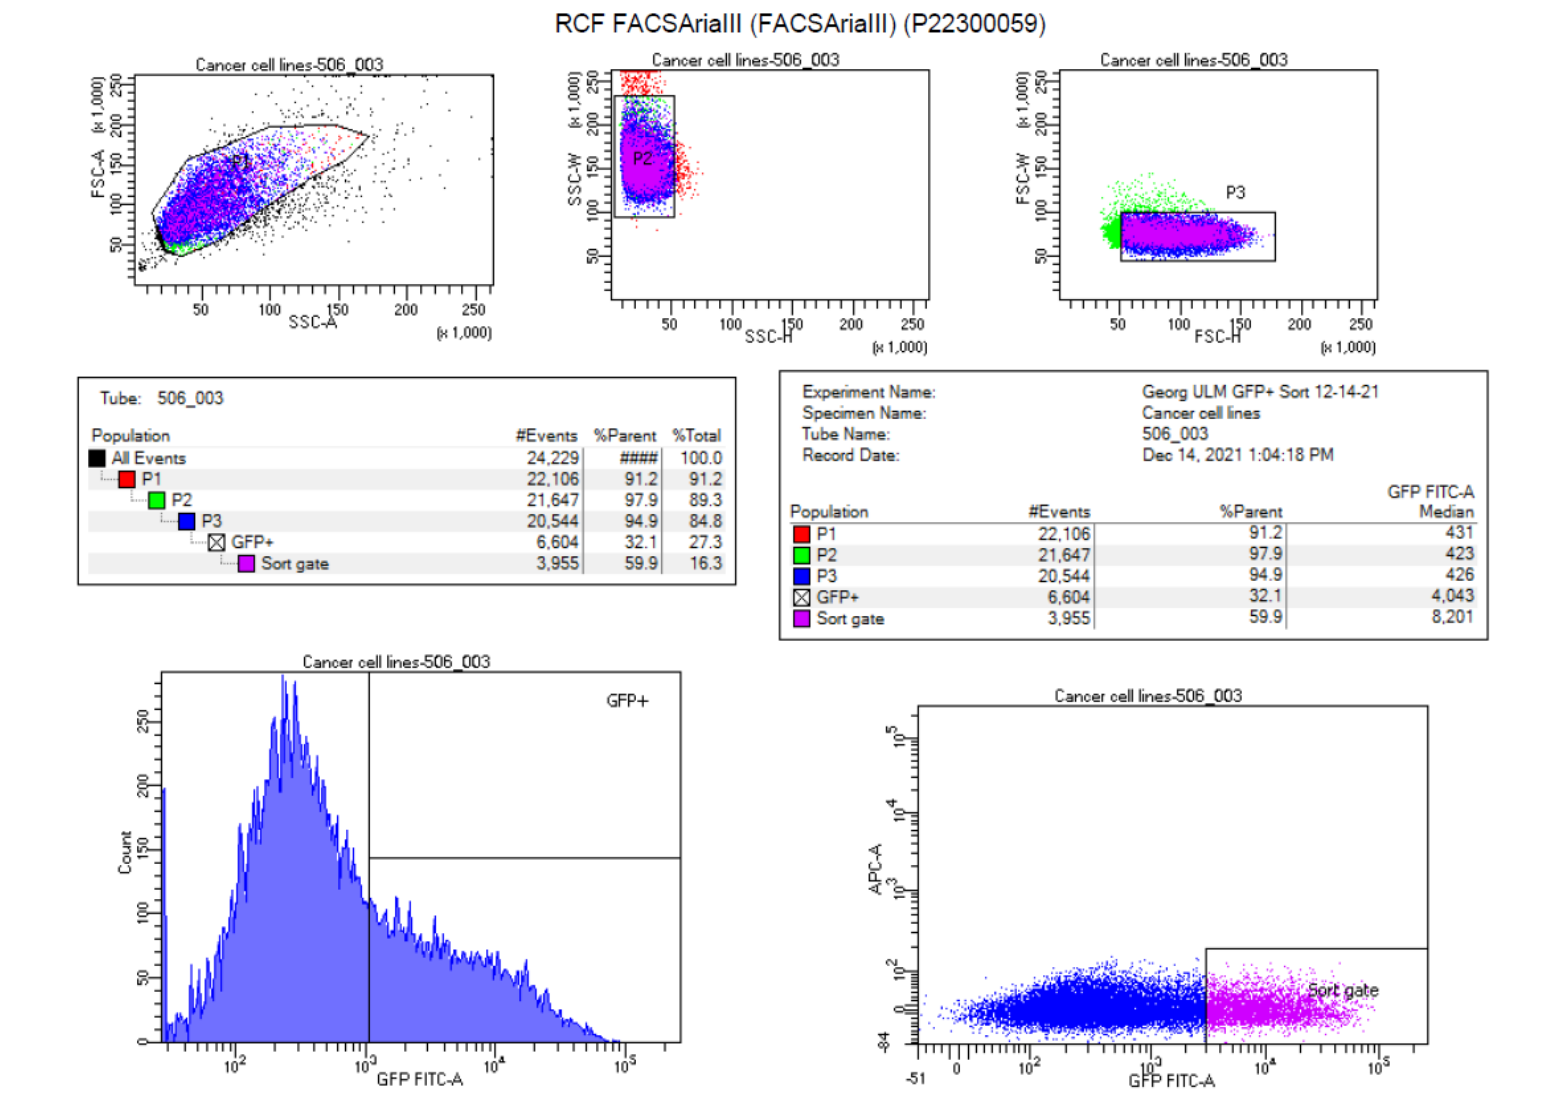

Sorting analysis of A549-anti-miR-506 cells

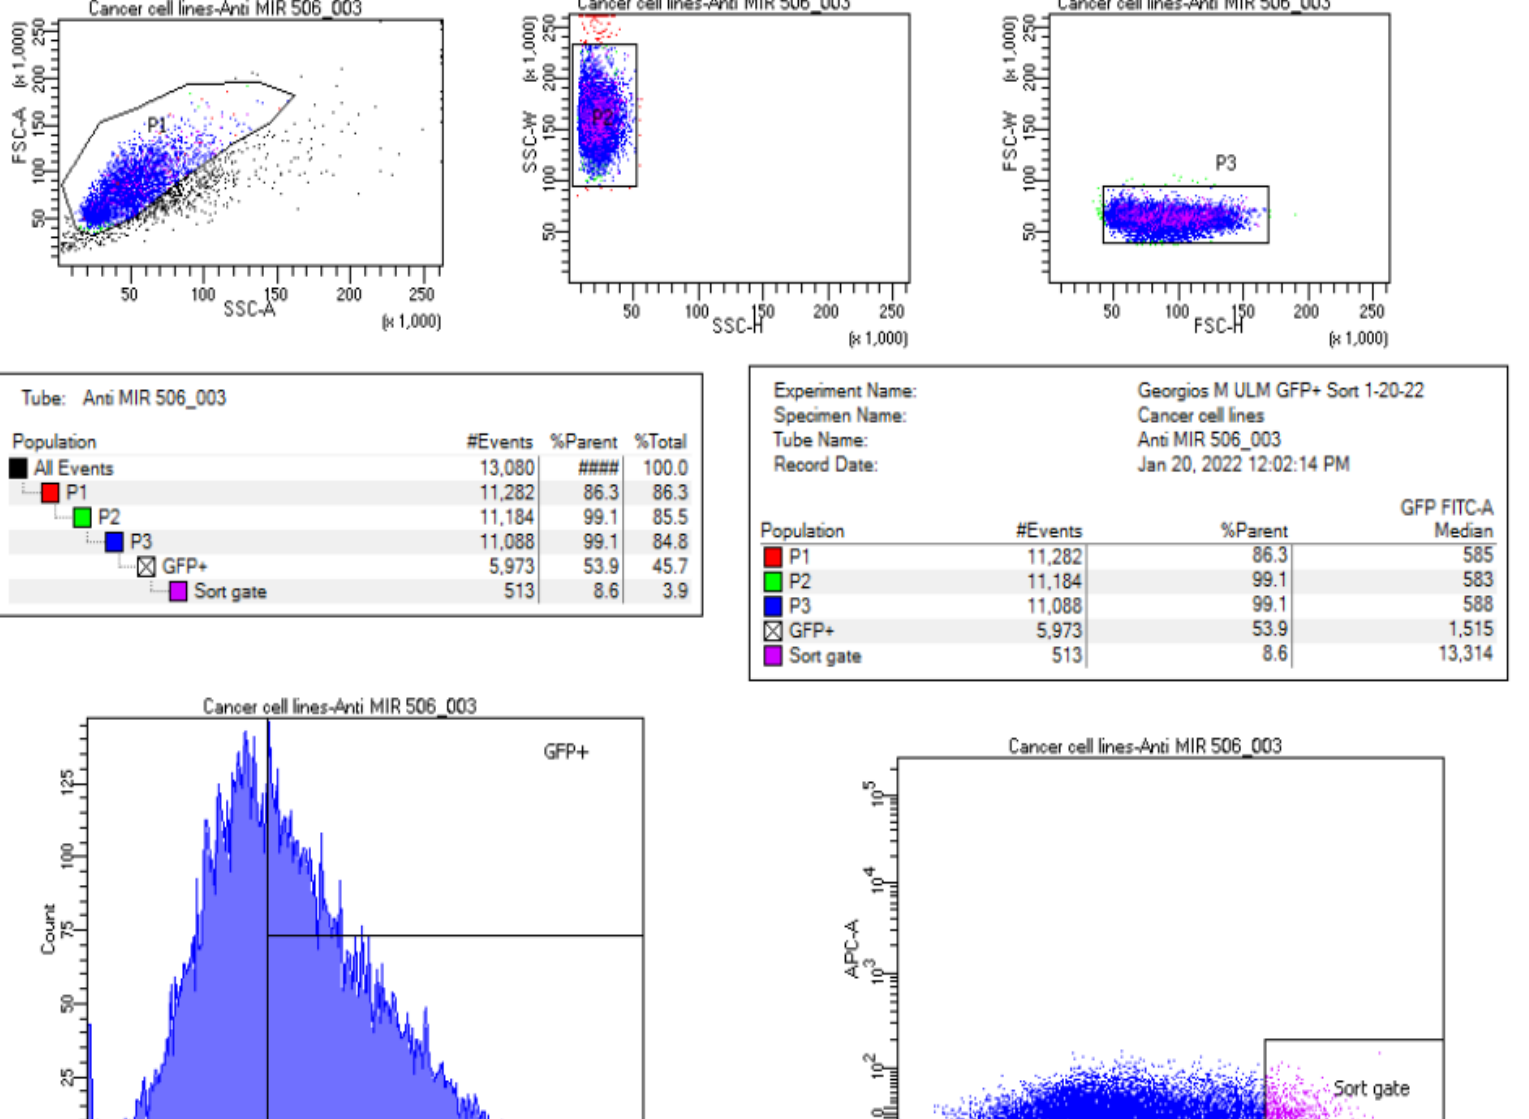

Sorting analysis of A549-miR-143/506 cells

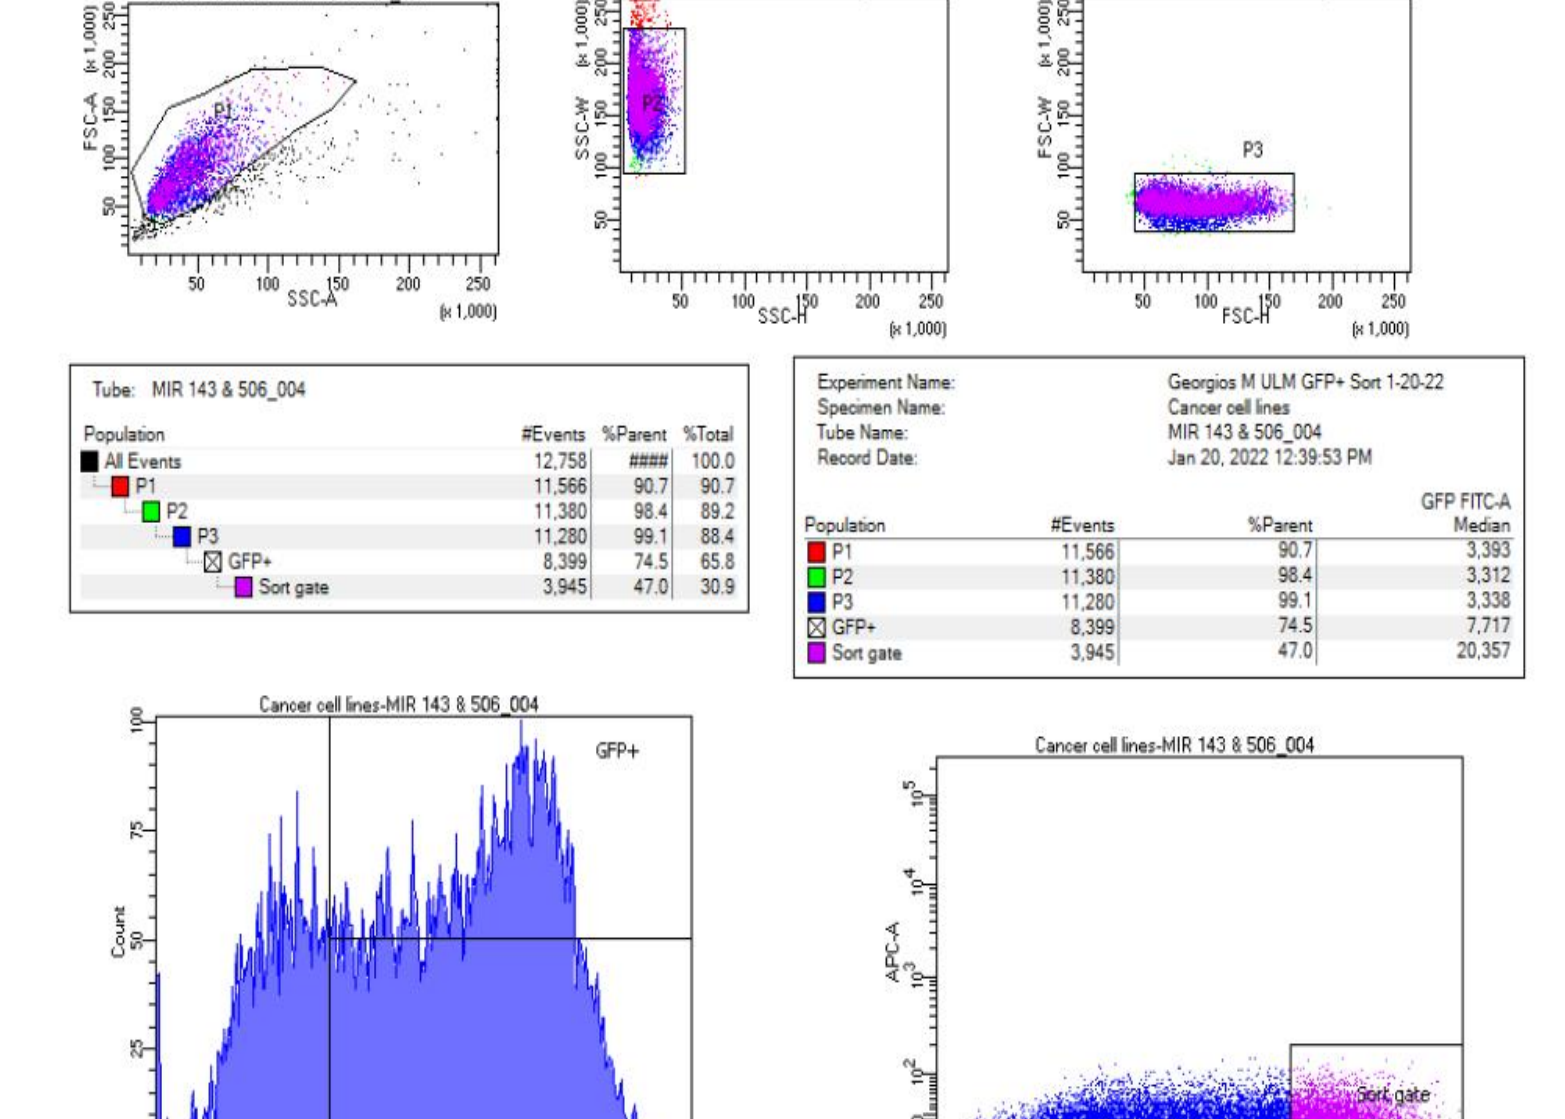

Sorting analysis of A549-anti-miR-143/506 cells

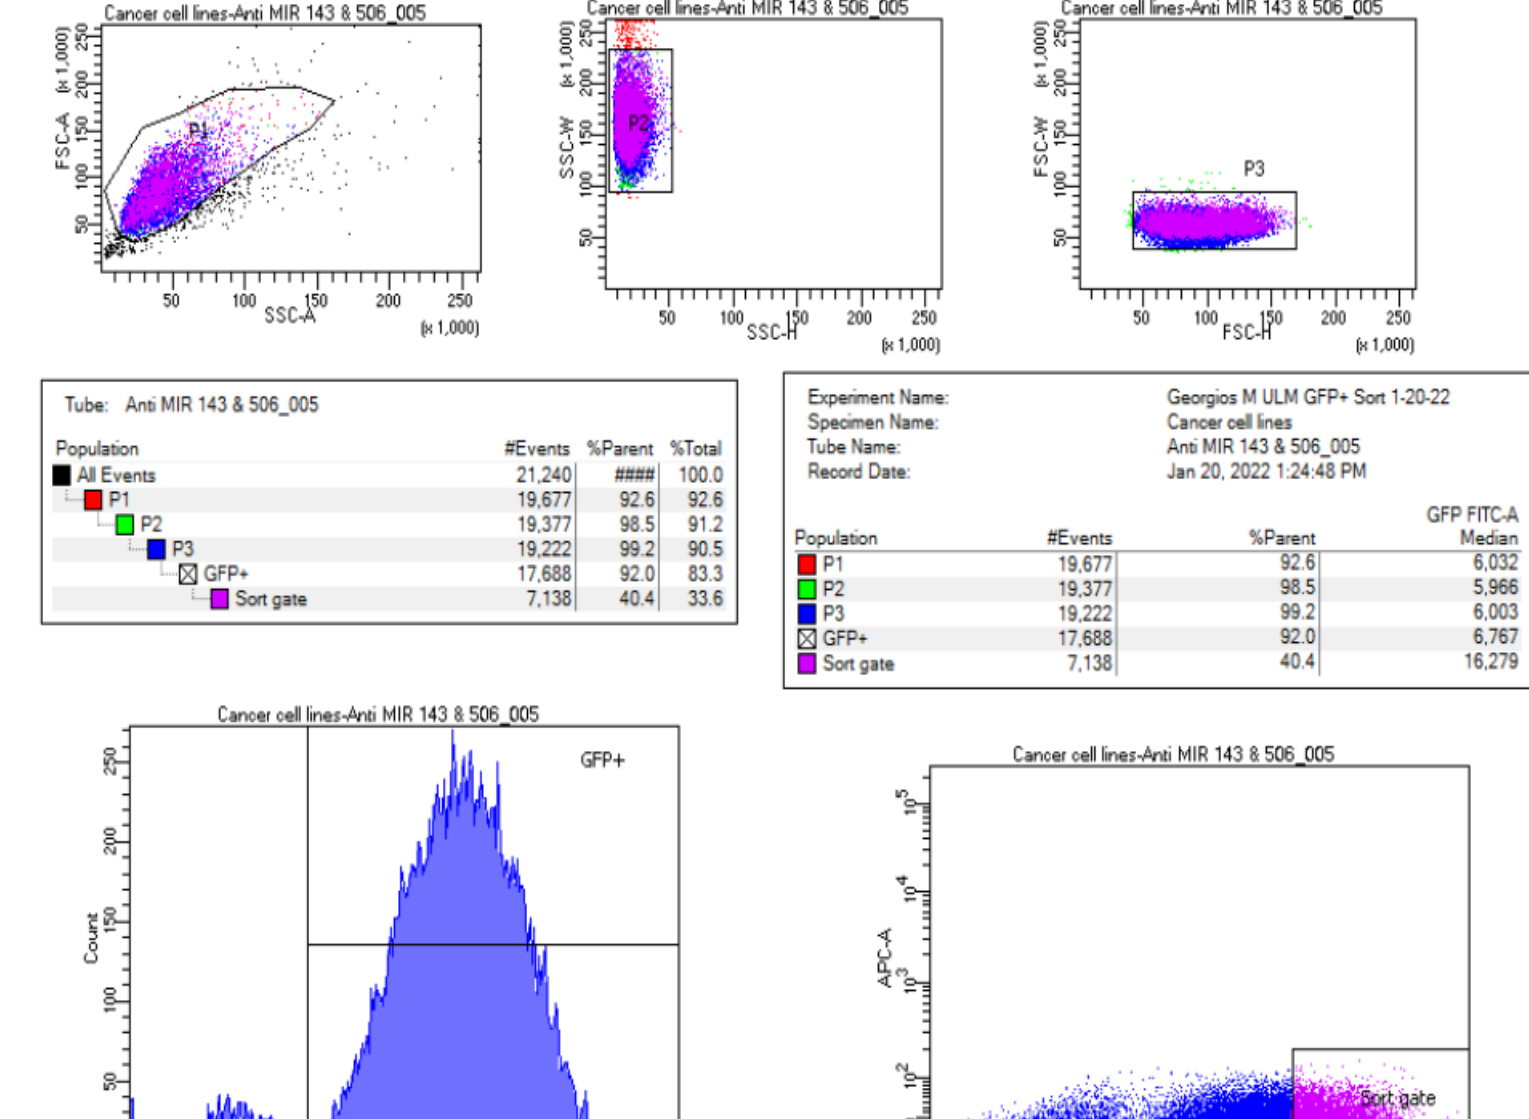



Supplementary Figure S3: Cell authentication of A549 transduced cells for the different miR deregulations indicated 100% match to the parent A549 cell line.

| % Match | ATCC® Cat. No. | Designation                                 | D5S818 | D13S317 | D7S820 | D16S539 | vWA | TH01  | AMEL | TPOX | CSF1PO |
|---------|----------------|---------------------------------------------|--------|---------|--------|---------|-----|-------|------|------|--------|
| 100     | STRC2013       | A549(m-GFP2)                                | 11     | 11      | 8,11   | 11,12   | 14  | 8,9.3 | X,Y  | 8,11 | 10,12  |
| 100     | CCL-185        | A-549; Lung Carcinoma; Human (Homo sapiens) | 11     | 11      | 8,11   | 11,12   | 14  | 8,9.3 | X,Y  | 8,11 | 10,12  |

| % Match | ATCC® Cat. No. | Designation                                 | D5S818 | D13S317 | D7S820 | D16S539  | vWA | TH01  | AMEL | TPOX | CSF1PO |
|---------|----------------|---------------------------------------------|--------|---------|--------|----------|-----|-------|------|------|--------|
| 100     | STRC2014       | A549(ANTI_m-143)                            | 11     | 11      | 8,11   | 11,12,13 | 14  | 8,9.3 | X,Y  | 8,11 | 10,12  |
| 100     | CCL-185        | A-549; Lung Carcinoma; Human (Homo sapiens) | 11     | 11      | 8,11   | 11,12    | 14  | 8,9.3 | X,Y  | 8,11 | 10,12  |

| % Match | ATCC® Cat. No. | Designation                                 | D5S818 | D13S317 | D7S820 | D16S539 | vWA | TH01  | AMEL | TPOX | CSF1PO |
|---------|----------------|---------------------------------------------|--------|---------|--------|---------|-----|-------|------|------|--------|
| 100     | STRC2015       | A549(m-143)                                 | 11     | 11      | 8,11   | 11,12   | 14  | 8,9.3 | X,Y  | 8,11 | 10,12  |
| 100     | CCL-185        | A-549; Lung Carcinoma; Human (Homo sapiens) | 11     | 11      | 8,11   | 11,12   | 14  | 8,9.3 | X,Y  | 8,11 | 10,12  |

| % Match | ATCC® Cat. No. | Designation                                 | D5S818 | D13S317 | D7S820 | D16S539 | vWA | TH01  | AMEL | TPOX | CSF1PO |
|---------|----------------|---------------------------------------------|--------|---------|--------|---------|-----|-------|------|------|--------|
| 100     | STRC2016       | A549(m-506)                                 | 11     | 11      | 8,11   | 11,12   | 14  | 8,9.3 | X,Y  | 8,11 | 10,12  |
| 100     | CCL-185        | A-549; Lung Carcinoma; Human (Homo sapiens) | 11     | 11      | 8,11   | 11,12   | 14  | 8,9.3 | X,Y  | 8,11 | 10,12  |

| % Match | ATCC® Cat. No. | Designation                                 | D5S818 | D13S317 | D7S820 | D16S539 | vWA | TH01  | AMEL | TPOX | CSF1PO |
|---------|----------------|---------------------------------------------|--------|---------|--------|---------|-----|-------|------|------|--------|
| 100     | STRC2017       | A549 (ANTI_m-506)                           | 11     | 11      | 8,11   | 11,12   | 14  | 8,9.3 | X,Y  | 8,11 | 10,12  |
| 100     | CCL-185        | A-549; Lung Carcinoma; Human (Homo sapiens) | 11     | 11      | 8,11   | 11,12   | 14  | 8,9.3 | X,Y  | 8,11 | 10,12  |

| % Match | ATCC® Cat. No. | Designation                                 | D5S818 | D13S317 | D7S820 | D16S539 | vWA | TH01  | AMEL | TPOX | CSF1PO |
|---------|----------------|---------------------------------------------|--------|---------|--------|---------|-----|-------|------|------|--------|
| 100     | STRC2018       | A549 (m-143/506)                            | 11     | 11      | 8,11   | 11,12   | 14  | 8,9.3 | X,Y  | 8,11 | 10,12  |
| 100     | CCL-185        | A-549; Lung Carcinoma; Human (Homo sapiens) | 11     | 11      | 8,11   | 11,12   | 14  | 8,9.3 | X,Y  | 8,11 | 10,12  |

| % Match | ATCC® Cat. No. | Designation                                 | D5S818 | D13S317 | D7S820 | D16S539 | vWA | TH01  | AMEL | TPOX | CSF1PO |
|---------|----------------|---------------------------------------------|--------|---------|--------|---------|-----|-------|------|------|--------|
| 100     | STRC2019       | A549 (ANTI_m-143/506)                       | 11     | 11      | 8,11   | 11,12   | 14  | 8,9.3 | X,Y  | 8,11 | 10,12  |
| 100     | CCL-185        | A-549; Lung Carcinoma; Human (Homo sapiens) | 11     | 11      | 8,11   | 11,12   | 14  | 8,9.3 | X,Y  | 8,11 | 10,12  |

Supplementary Figure S4: Mycoplasma analysis of transduced A549 cells with the various miR deregulations. PC: positive control

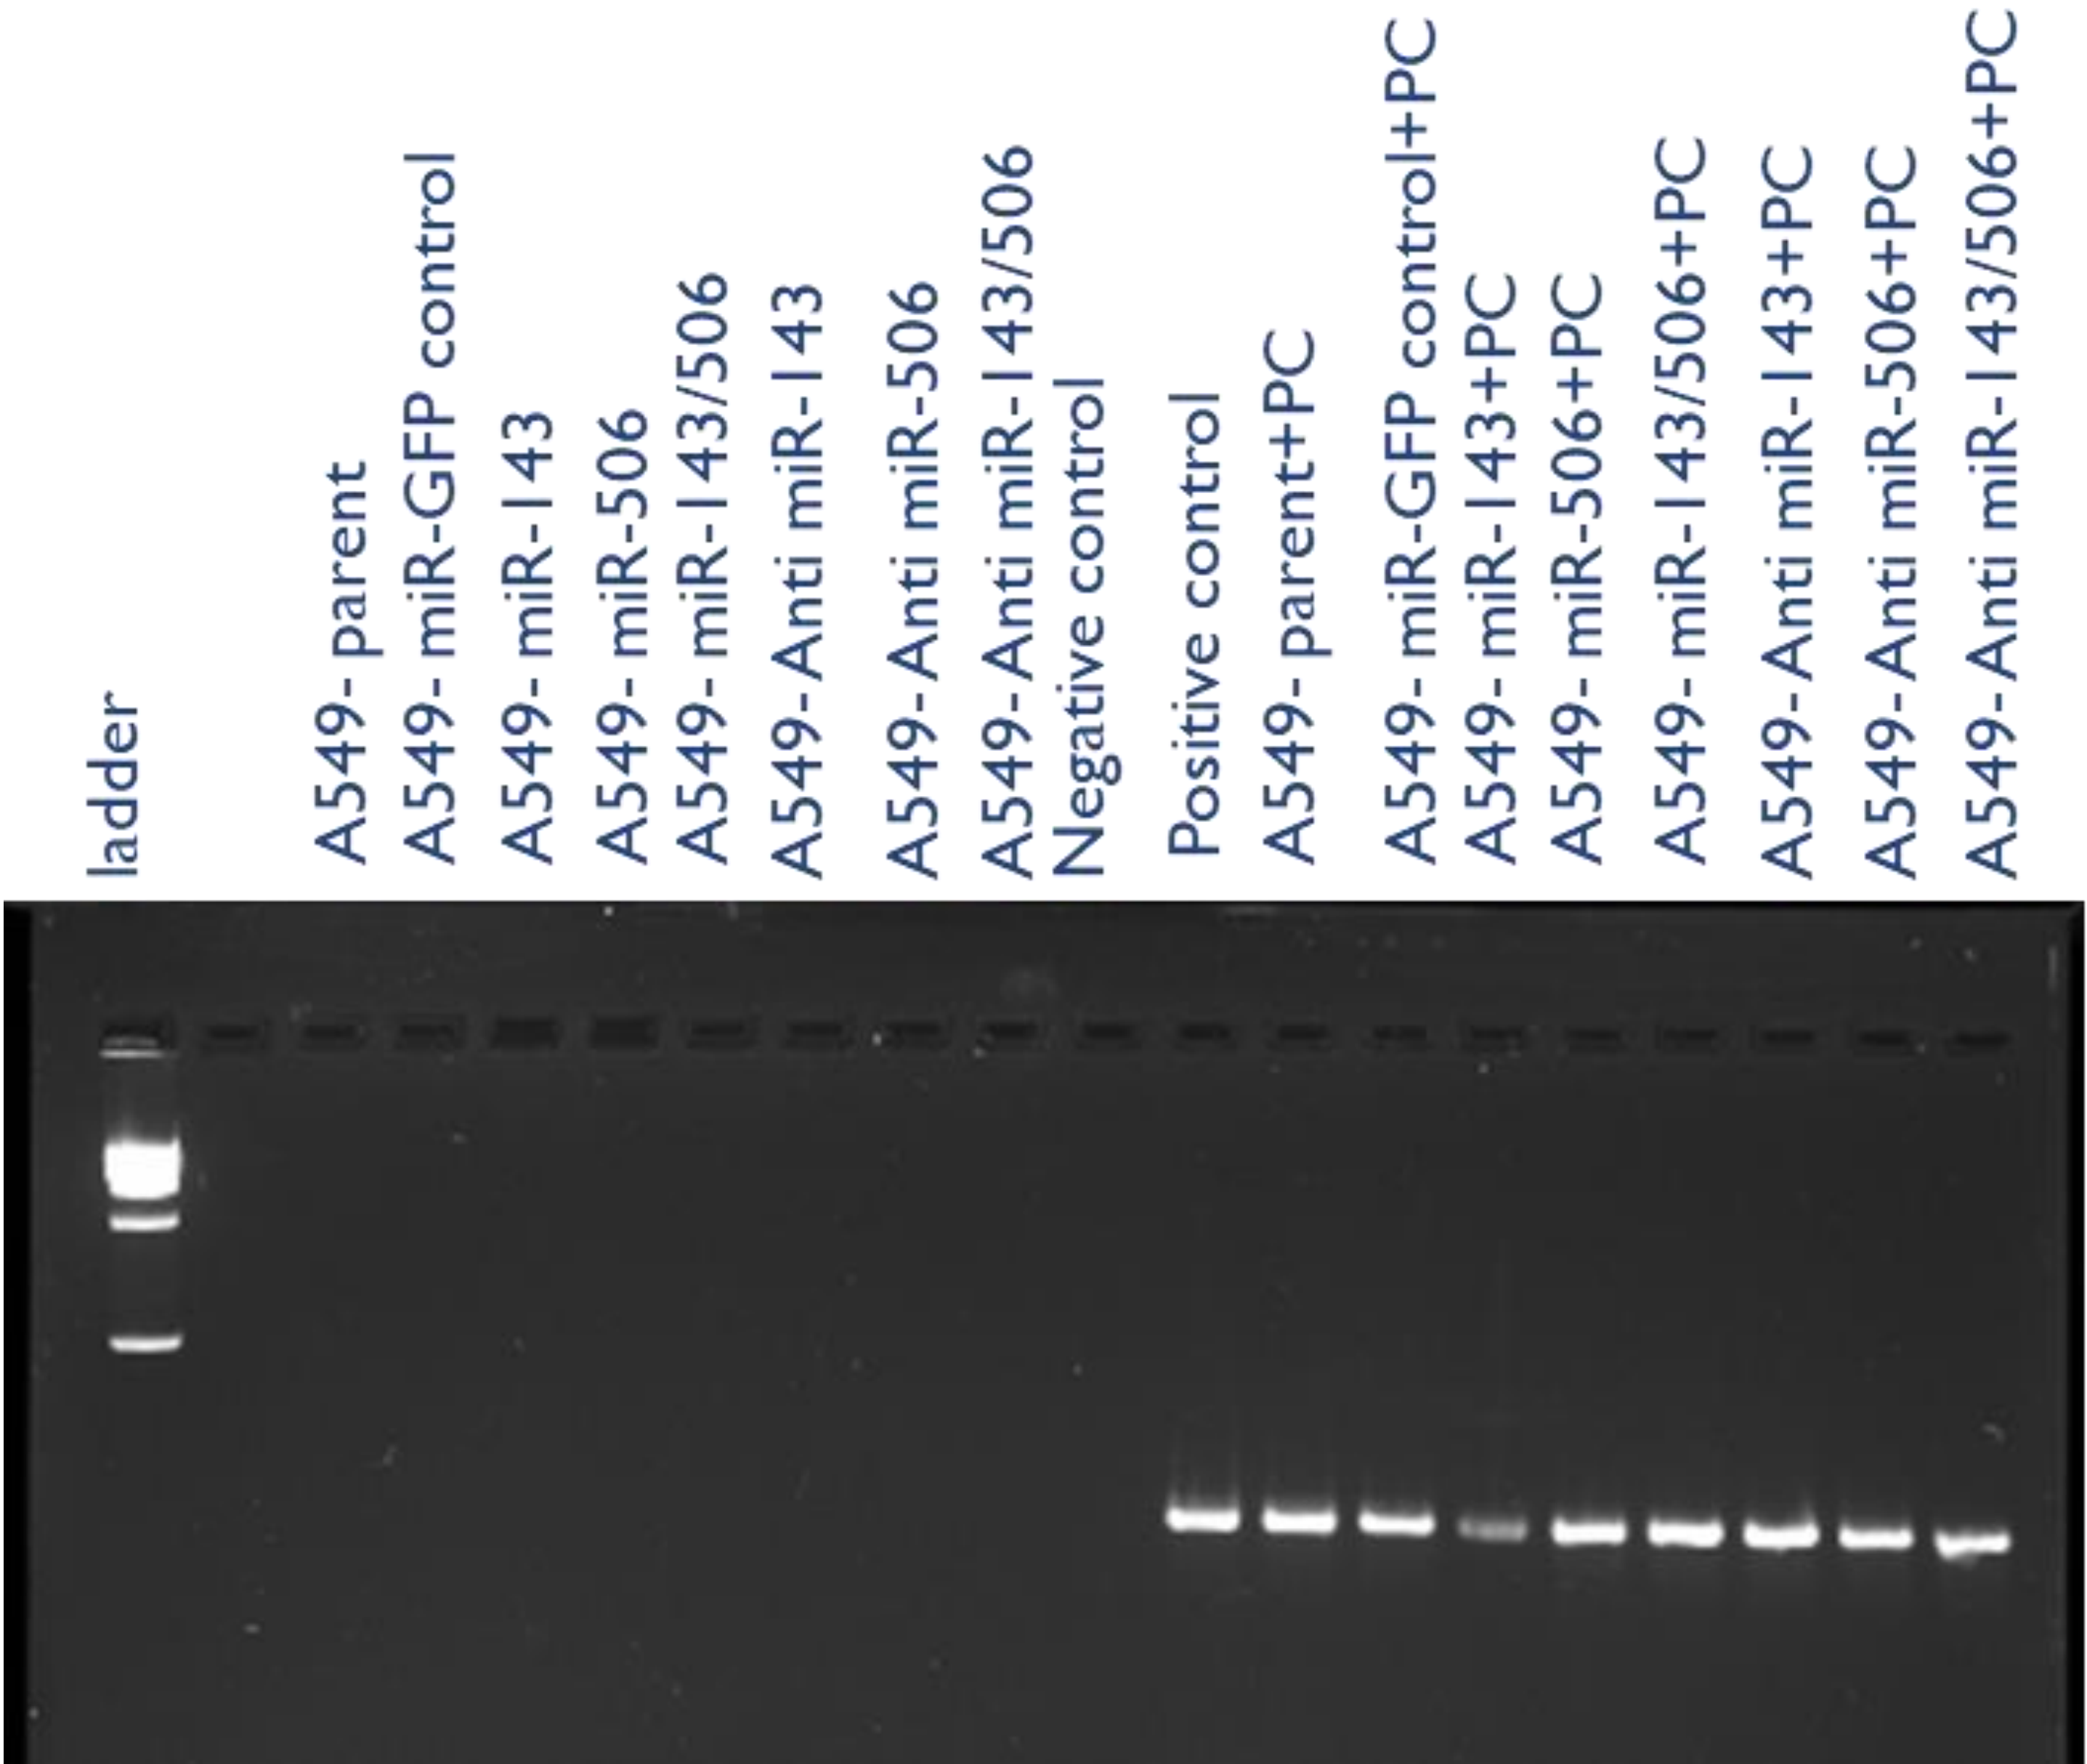



Supplementary Figure S5: Representative cell cycle analyses images for the different miR deregulated A549 cells using ModFit LT 5.0.

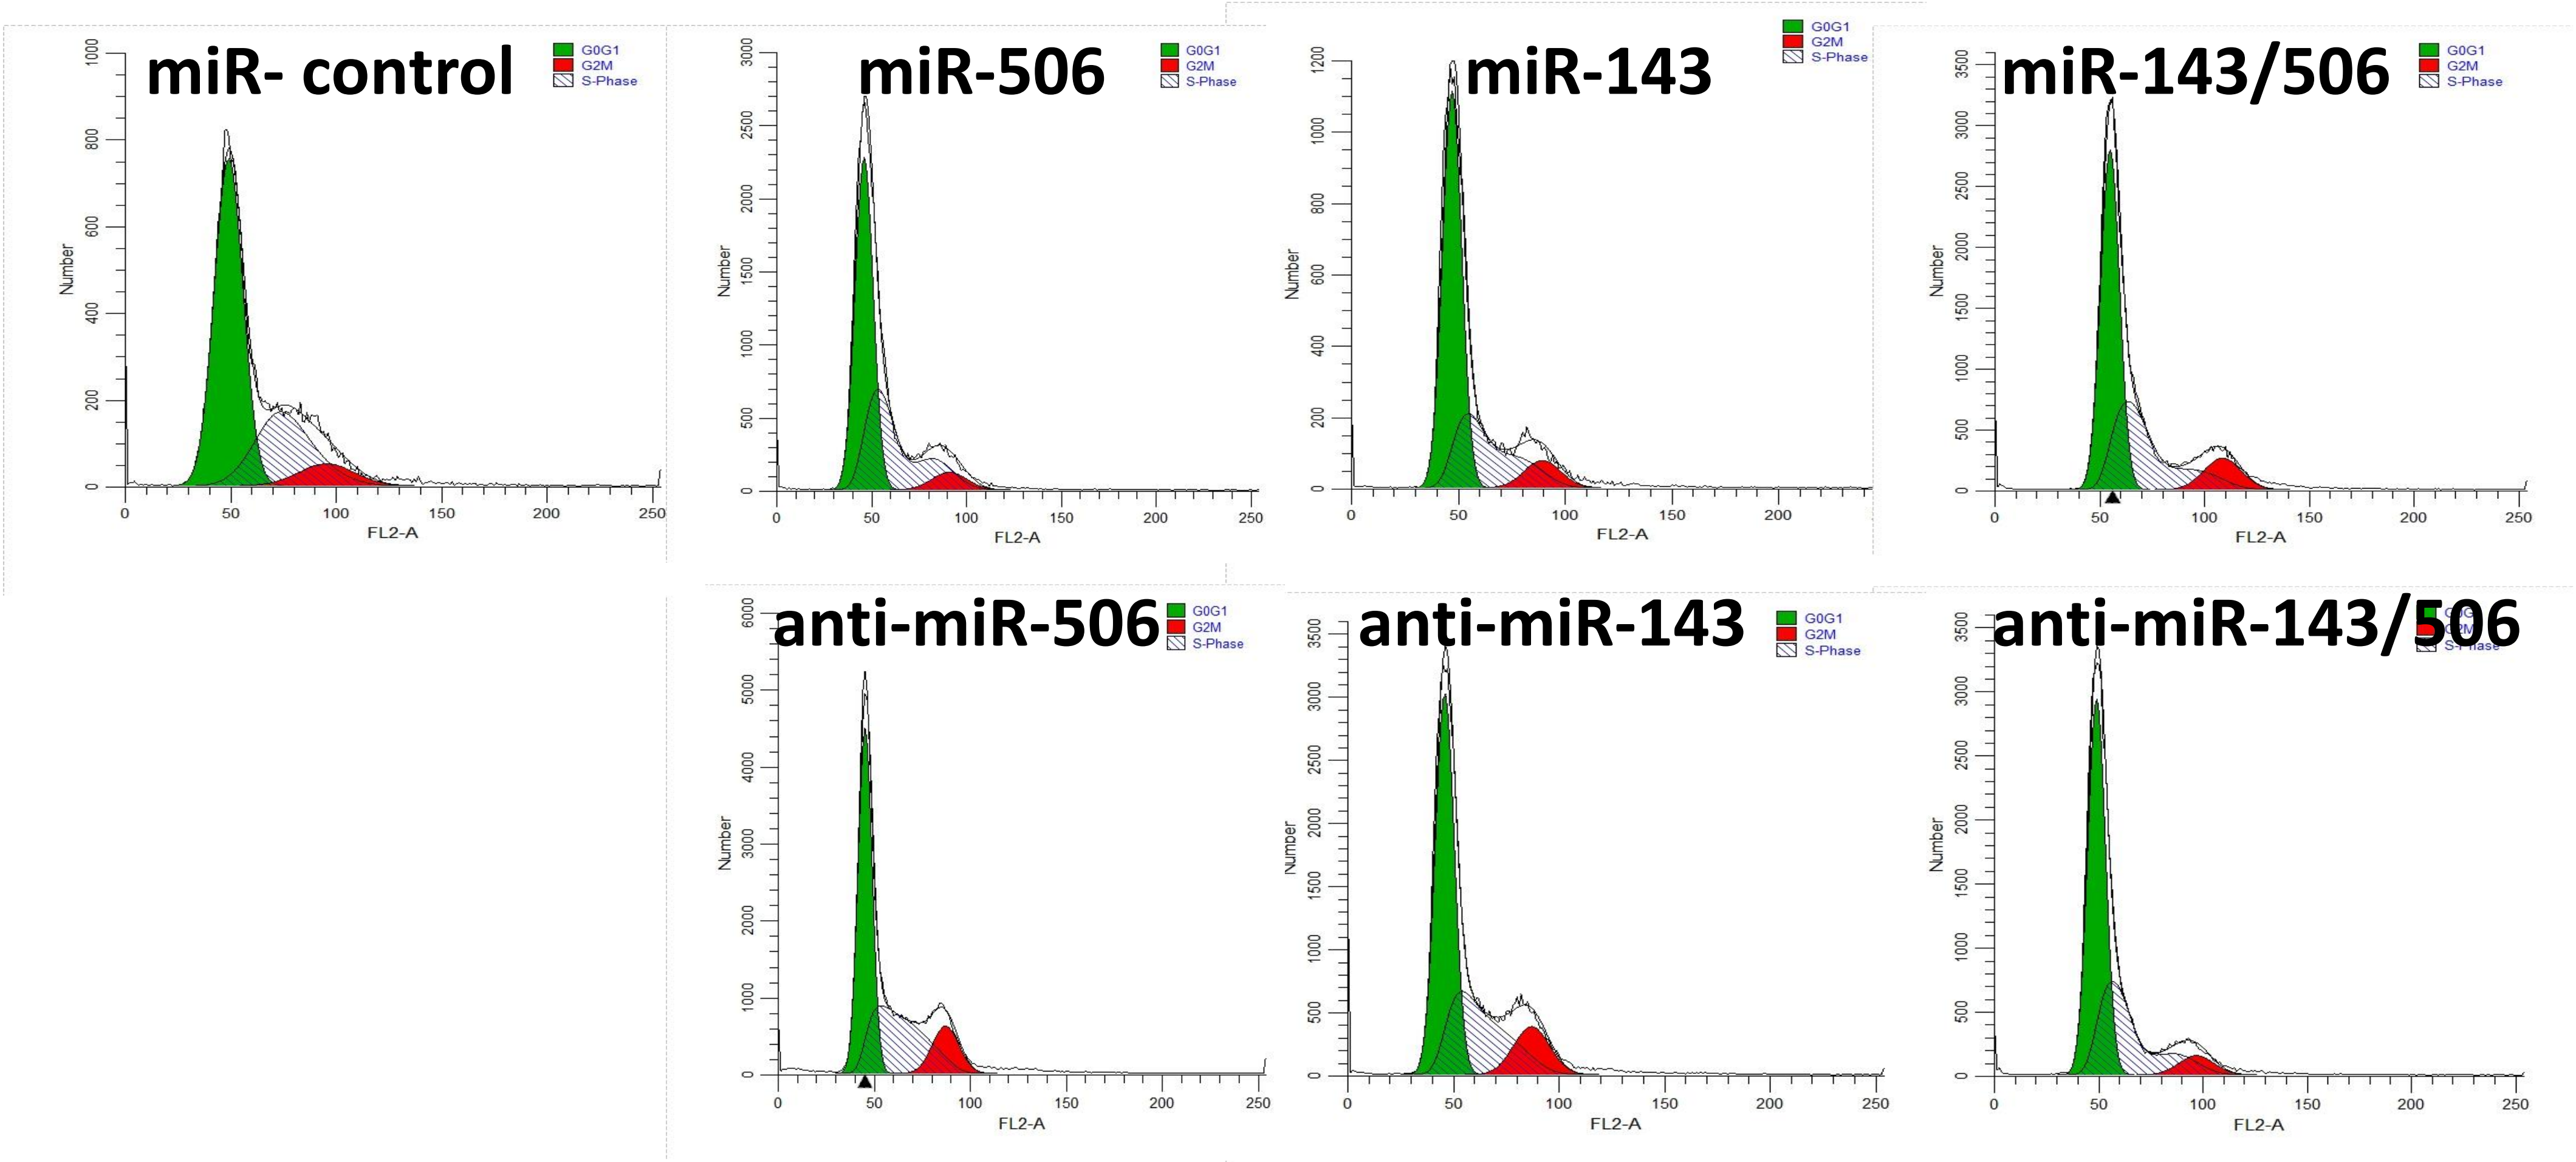

Supplement: s1 [file s1]
